# Supplementary material for: Development of a nomogram for prognostic prediction of lower‐grade glioma based on alternative splicing signatures
Source: PubMed Central journal article supplement (PMC7774734; doi:10.1002/cam4.3530), 2020-10-13
Supplement: CAM4-9-9266-s002.pdf [file CAM4-9-9266-s002.pdf]

A

## Training set (N=340)

| Subgroup                      | No. of patients (%) | Hazard Ratio (95%CI)      | P value  |
|-------------------------------|---------------------|---------------------------|----------|
| <b>All patients</b>           | <b>340 (100)</b>    | <b>4.811(3.067–7.561)</b> | <b>*</b> |
| <b>Age, years</b>             |                     |                           |          |
| <40                           | 139 (40.9)          | 5.099(5.051–5.147)        | *        |
| 40–59                         | 150 (44.1)          | 3.054(3.003–3.111)        | *        |
| 60–79                         | 47 (13.8)           | 3.057(3.009–3.105)        | *        |
| >=80                          | 4 (1.2)             | NA                        | NA       |
| <b>Sex</b>                    |                     |                           |          |
| Male                          | 182 (53.5)          | 5.013(4.621–5.405)        | *        |
| Female                        | 158 (46.5)          | 4.398(4.006–4.790)        | *        |
| <b>New event</b>              |                     |                           |          |
| None or NA                    | 151 (44.4)          | 4.798(4.406–5.190)        | *        |
| Yes                           | 189 (55.6)          | 4.973(4.581–5.365)        | *        |
| <b>KPS</b>                    |                     |                           |          |
| <80                           | 25 (7.4)            | 3.728(3.336–4.120)        | *        |
| >=80                          | 172 (50.6)          | 4.833(4.441–5.225)        | *        |
| NA                            | 143 (42.0)          | 4.711(4.319–5.103)        | *        |
| <b>Histology</b>              |                     |                           |          |
| Astrocytoma                   | 127 (0.37)          | 4.719(4.327–5.111)        | *        |
| Oligoastrocytoma              | 85 (0.25)           | 4.538(4.146–4.930)        | *        |
| Oligodendroglioma             | 128 (0.38)          | 4.976(4.584–5.368)        | *        |
| <b>WHO grade</b>              |                     |                           |          |
| Grade II                      | 163 (0.48)          | 4.877(4.485–5.269)        | *        |
| Grade III                     | 177 (0.52)          | 4.198(3.806–4.591)        | *        |
| <b>Pharmaceutical therapy</b> |                     |                           |          |
| TMZ                           | 155 (0.46)          | 4.810(4.418–5.202)        | *        |
| PCV                           | 22 (0.06)           | 6.211(5.819–6.603)        | *        |
| TMZ+PCV                       | 3 (0.01)            | NA                        | NA       |
| Others                        | 11 (0.03)           | 2.179(0.379–3.452)        | *        |
| No or NA                      | 149 (0.44)          | 7.165(6.773–7.557)        | *        |
| <b>Radiation therapy</b>      |                     |                           |          |
| Yes                           | 113 (0.33)          | 4.813(4.421–5.205)        | *        |
| No                            | 184 (0.54)          | 4.808(4.416–5.201)        | *        |
| NA                            | 43 (0.13)           | 0.977(0.585–1.369)        | *        |
| <b>IDH mutation status</b>    |                     |                           |          |
| Mutant                        | 262 (0.77)          | 4.800(4.408–5.192)        | *        |
| Wildtype                      | 78 (0.23)           | 5.215(4.823–5.607)        | *        |
| <b>TP53 mutation status</b>   |                     |                           |          |
| Mutant                        | 174 (0.51)          | 4.810(4.418–5.202)        | *        |
| Wildtype                      | 166 (0.49)          | 4.817(4.425–5.209)        | *        |
| <b>PTEN mutation status</b>   |                     |                           |          |
| Mutant                        | 17 (0.05)           | 1.750(0.819–3.097)        | *        |
| Wildtype                      | 323 (0.95)          | 4.811(4.419–5.203)        | *        |
| <b>EGFR mutation status</b>   |                     |                           |          |
| Mutant                        | 20 (0.06)           | 3.782(3.390–4.174)        | *        |
| Wildtype                      | 320 (0.94)          | 4.811(4.419–5.203)        | *        |
| <b>ATRX mutation status</b>   |                     |                           |          |
| Mutant                        | 132 (0.39)          | 4.803(4.411–5.195)        | *        |
| Wildtype                      | 208 (0.61)          | 4.829(4.437–5.221)        | *        |

0 1 2 3 4 5 6 7 8  
Hazard Ratio and 95%CI

B

## Validation set (N=170)

| Subgroup                      | No. of patients (%) | Hazard Ratio (95%CI)      | P value  |
|-------------------------------|---------------------|---------------------------|----------|
| <b>All patients</b>           | <b>170 (100)</b>    | <b>3.638(1.704–7.765)</b> | <b>*</b> |
| <b>Age, years</b>             |                     |                           |          |
| <40                           | 95 (55.9)           | 3.819(3.427–4.211)        | *        |
| 40–59                         | 54 (31.8)           | 3.511(3.119–3.903)        | *        |
| 60–79                         | 21 (12.4)           | 3.502(3.11–3.894)         | *        |
| >=80                          | N/A                 | NA                        | NA       |
| <b>Sex</b>                    |                     |                           |          |
| Male                          | 102 (60)            | 3.631(3.239–4.023)        | *        |
| Female                        | 68 (40)             | 3.417(3.025–3.809)        | *        |
| <b>New event</b>              |                     |                           |          |
| None or NA                    | 82 (48.2)           | 4.125(3.733–4.517)        | *        |
| Yes                           | 88 (51.8)           | 3.16(2.768–3.552)         | *        |
| <b>KPS</b>                    |                     |                           |          |
| <80                           | 15 (8.8)            | 2.188(1.796–2.58)         | *        |
| >=80                          | 91 (53.5)           | 3.64(3.248–4.032)         | *        |
| NA                            | 64 (37.6)           | 3.641(3.249–4.033)        | *        |
| <b>Histology</b>              |                     |                           |          |
| Astrocytoma                   | 67 (39.4)           | 3.531(3.139–3.923)        | *        |
| Oligoastrocytoma              | 45 (26.5)           | 3.602(3.21–3.994)         | *        |
| Oligodendroglioma             | 58 (34.1)           | 4.078(3.686–4.47)         | *        |
| <b>WHO grade</b>              |                     |                           |          |
| Grade II                      | 84 (49.4)           | 3.636(3.244–4.028)        | *        |
| Grade III                     | 86 (50.6)           | 3.642(3.25–4.034)         | *        |
| <b>Pharmaceutical therapy</b> |                     |                           |          |
| TMZ                           | 82 (48.2)           | 3.143(2.751–3.535)        | *        |
| PCV                           | 8 (4.7)             | NA                        | NA       |
| TMZ+PCV                       | 2 (1.2)             | NA                        | NA       |
| Others                        | 3 (1.8)             | NA                        | NA       |
| No or NA                      | 75 (44.1)           | 4.715(4.323–5.107)        | *        |
| <b>Radiation therapy</b>      |                     |                           |          |
| Yes                           | 53 (31.2)           | 3.599(3.207–3.991)        | *        |
| No                            | 93 (54.7)           | 3.659(3.267–4.051)        | *        |
| NA                            | 24 (14.1)           | 2.901(2.509–3.293)        | *        |
| <b>IDH mutation status</b>    |                     |                           |          |
| Mutant                        | 133 (78.2)          | 3.639(3.247–4.031)        | *        |
| Wildtype                      | 37 (21.8)           | 2.165(1.773–2.557)        | *        |
| <b>TP53 mutation status</b>   |                     |                           |          |
| Mutant                        | 72 (42.4)           | 4.013(3.621–4.405)        | *        |
| Wildtype                      | 98 (57.6)           | 3.396(3.004–3.788)        | *        |
| <b>PTEN mutation status</b>   |                     |                           |          |
| Mutant                        | 9 (5.3)             | NA                        | NA       |
| Wildtype                      | 161 (94.7)          | 3.638(3.246–4.03)         | *        |
| <b>EGFR mutation status</b>   |                     |                           |          |
| Mutant                        | 17 (10)             | 1.133(0.741–1.525)        | *        |
| Wildtype                      | 153 (90)            | 3.637(3.245–4.029)        | *        |
| <b>ATRX mutation status</b>   |                     |                           |          |
| Mutant                        | 63 (37.1)           | 3.661(3.269–4.053)        | *        |
| Wildtype                      | 107 (62.9)          | 3.303(2.911–3.695)        | *        |

1 2 3 4 5 6 7 8  
Hazard Ratio and 95%CI
