# Supplementary material for: Development of a nomogram for prognostic prediction of lower‐grade glioma based on alternative splicing signatures
Source: PubMed Central journal article supplement (PMC7774734; doi:10.1002/cam4.3530), 2020-10-13

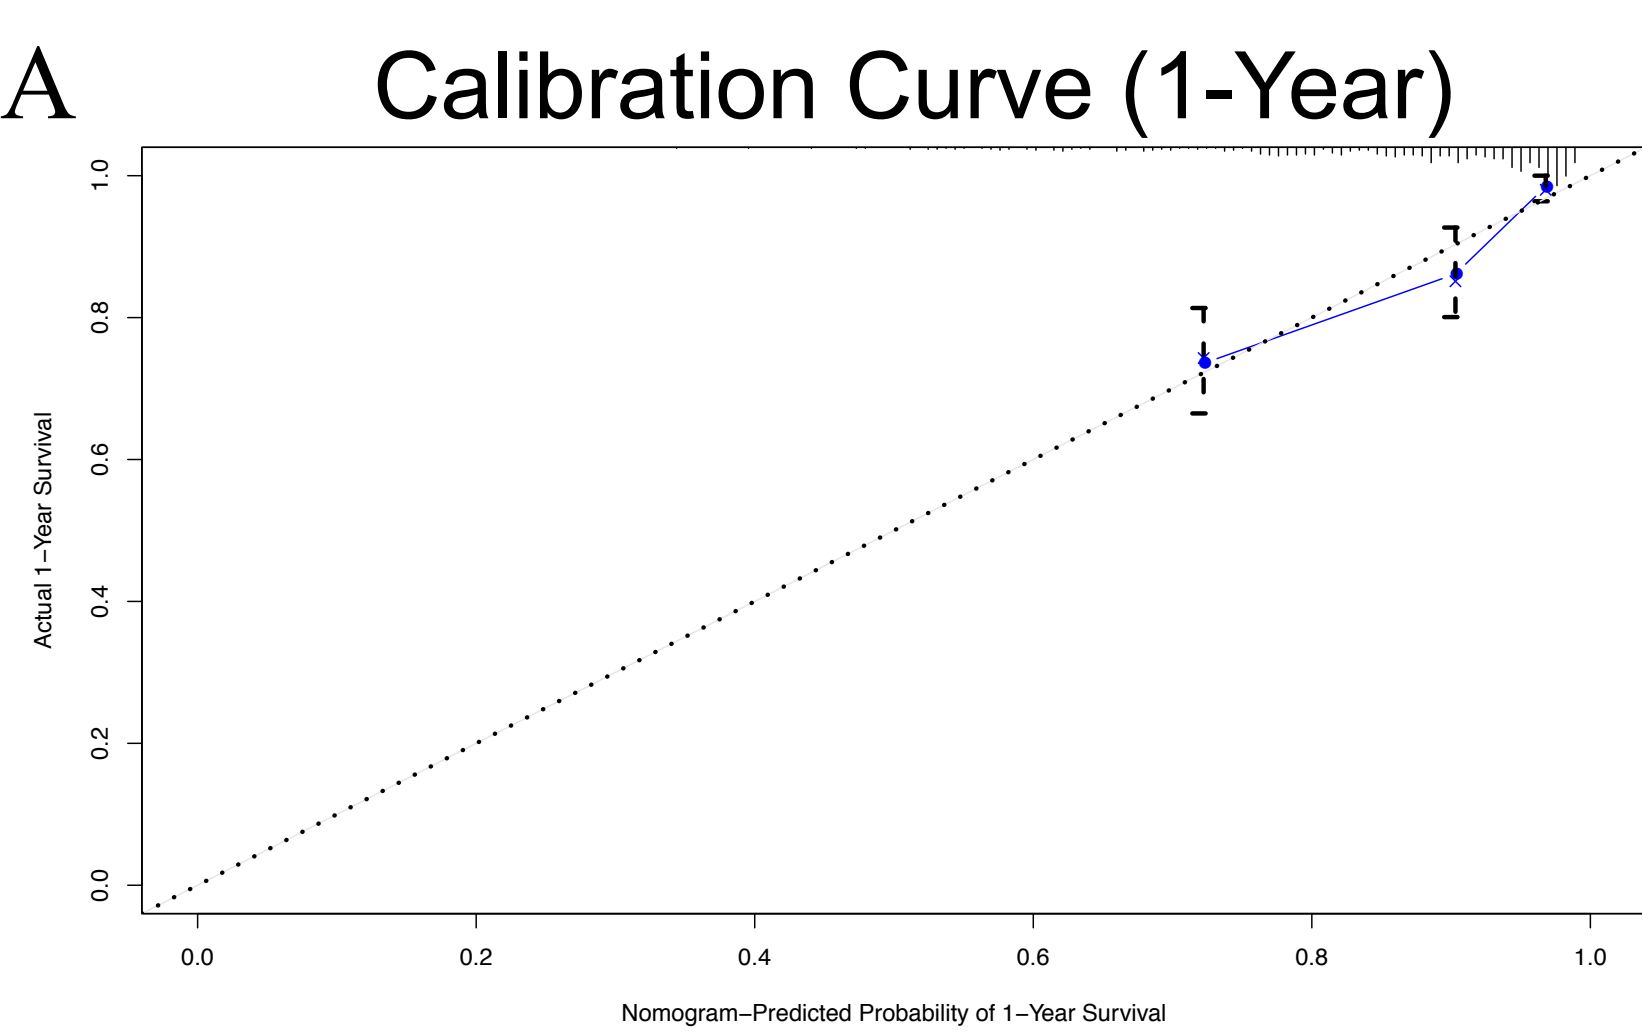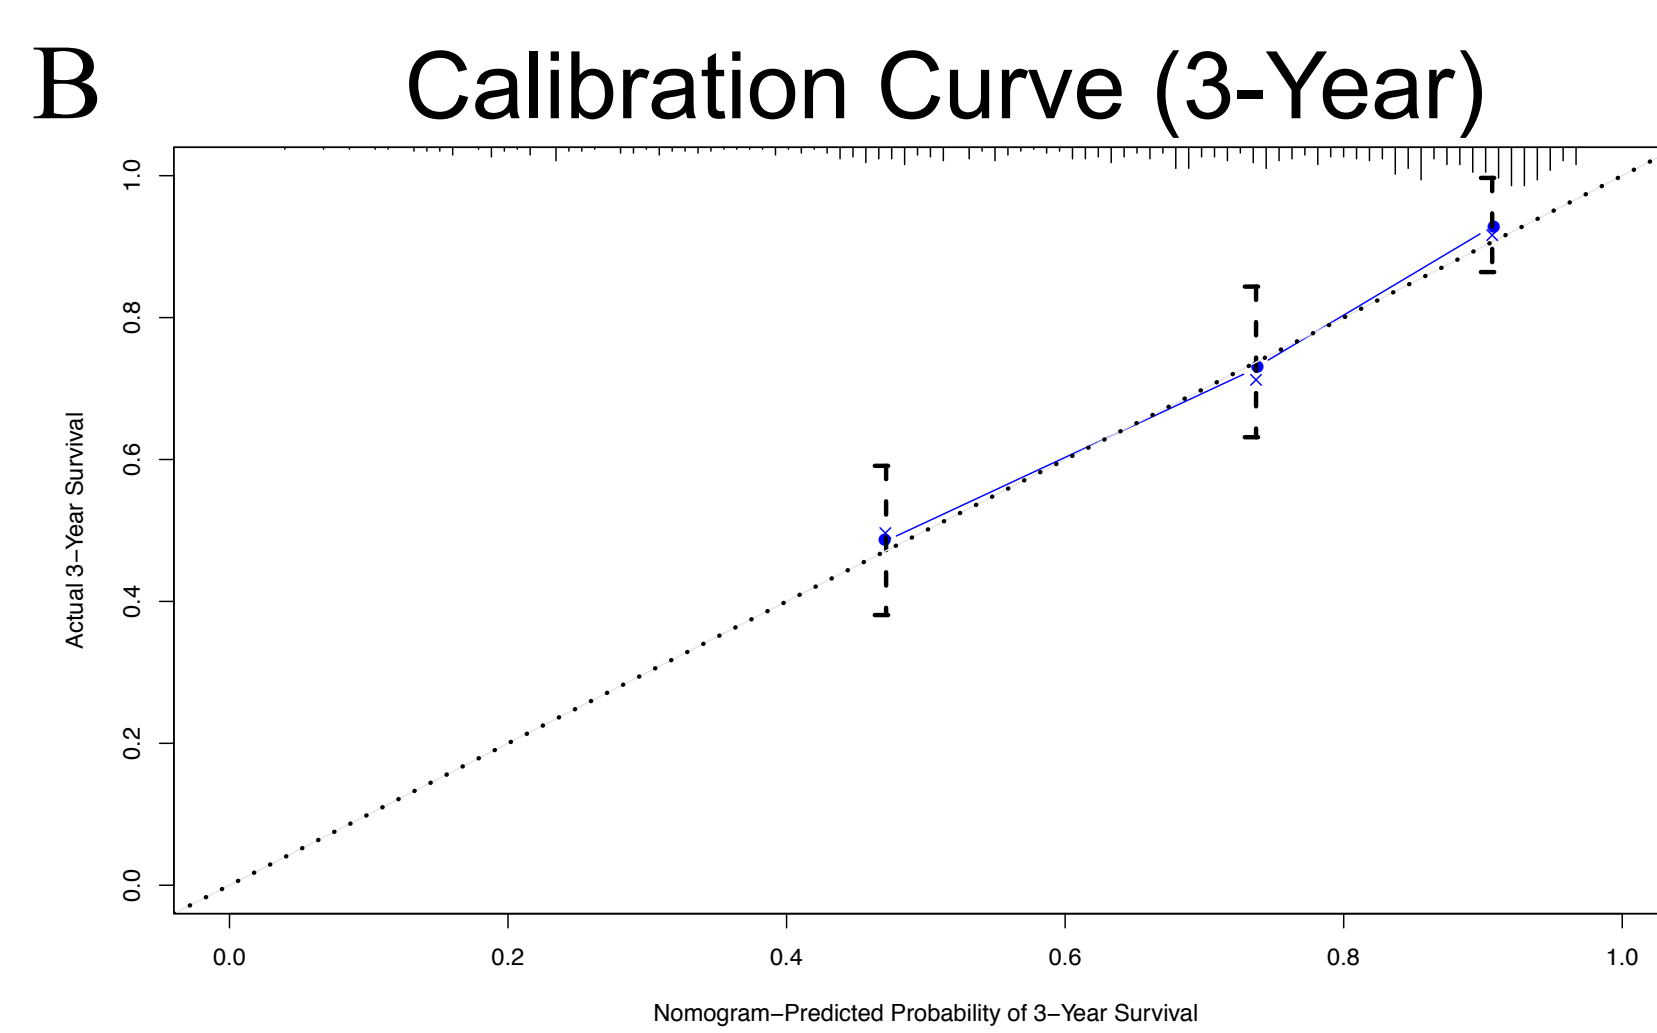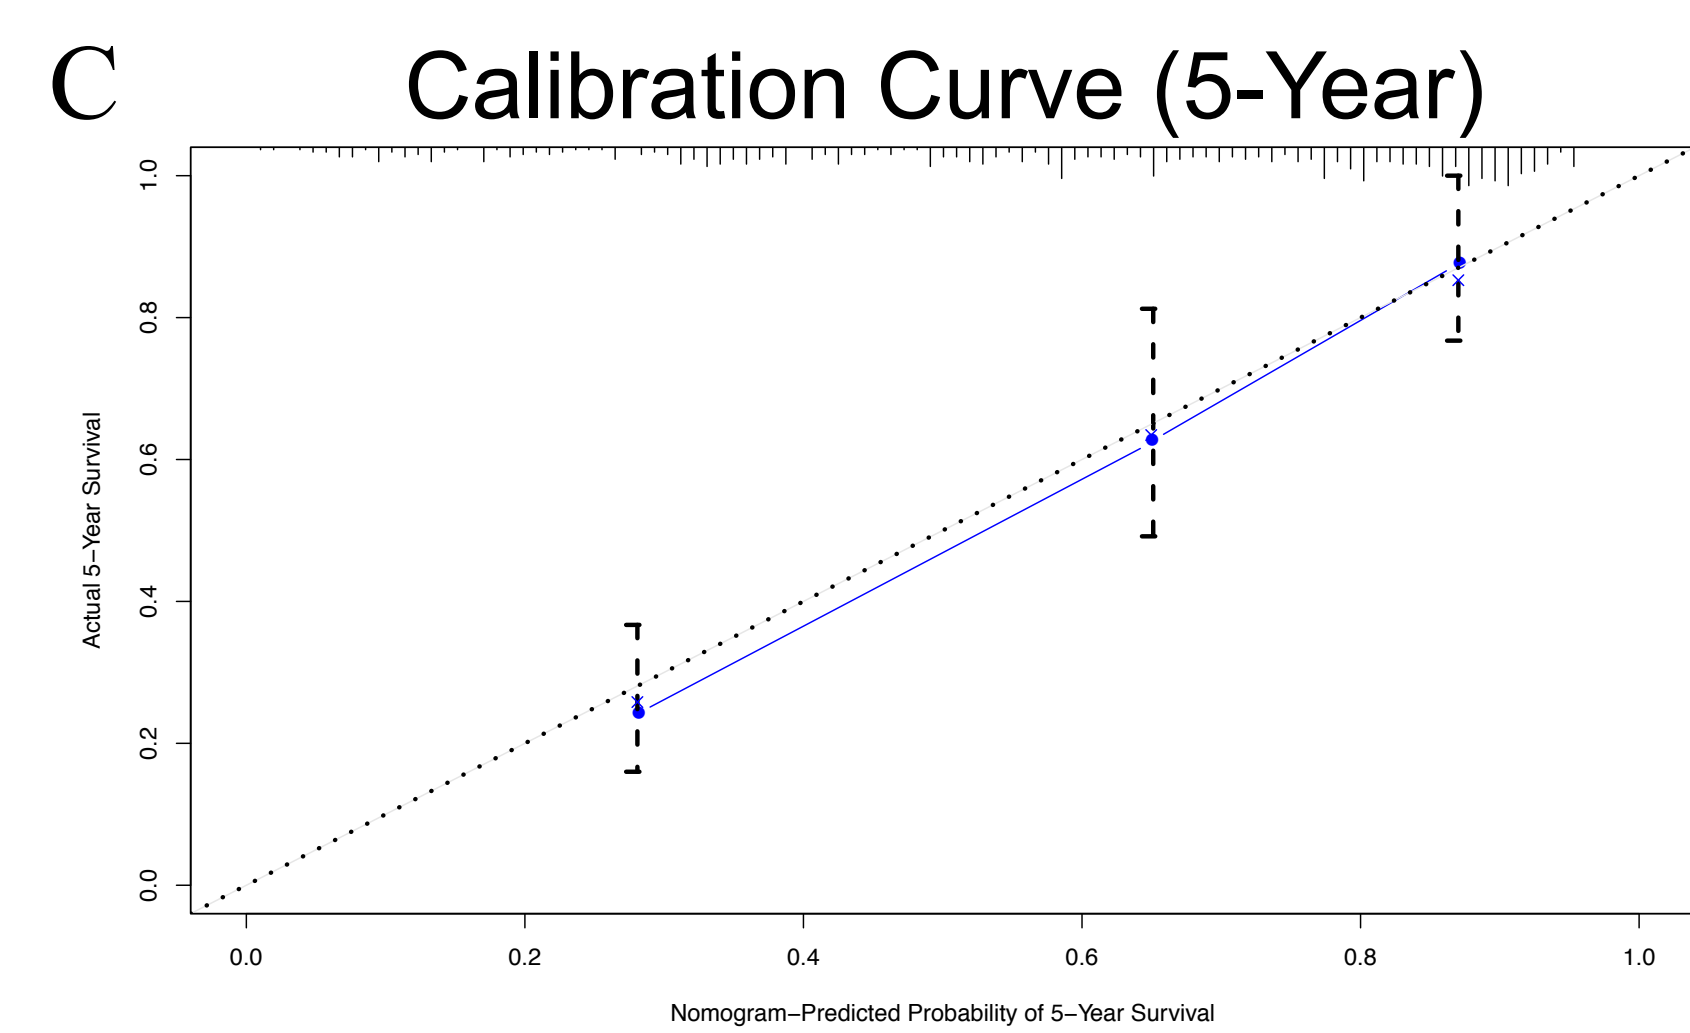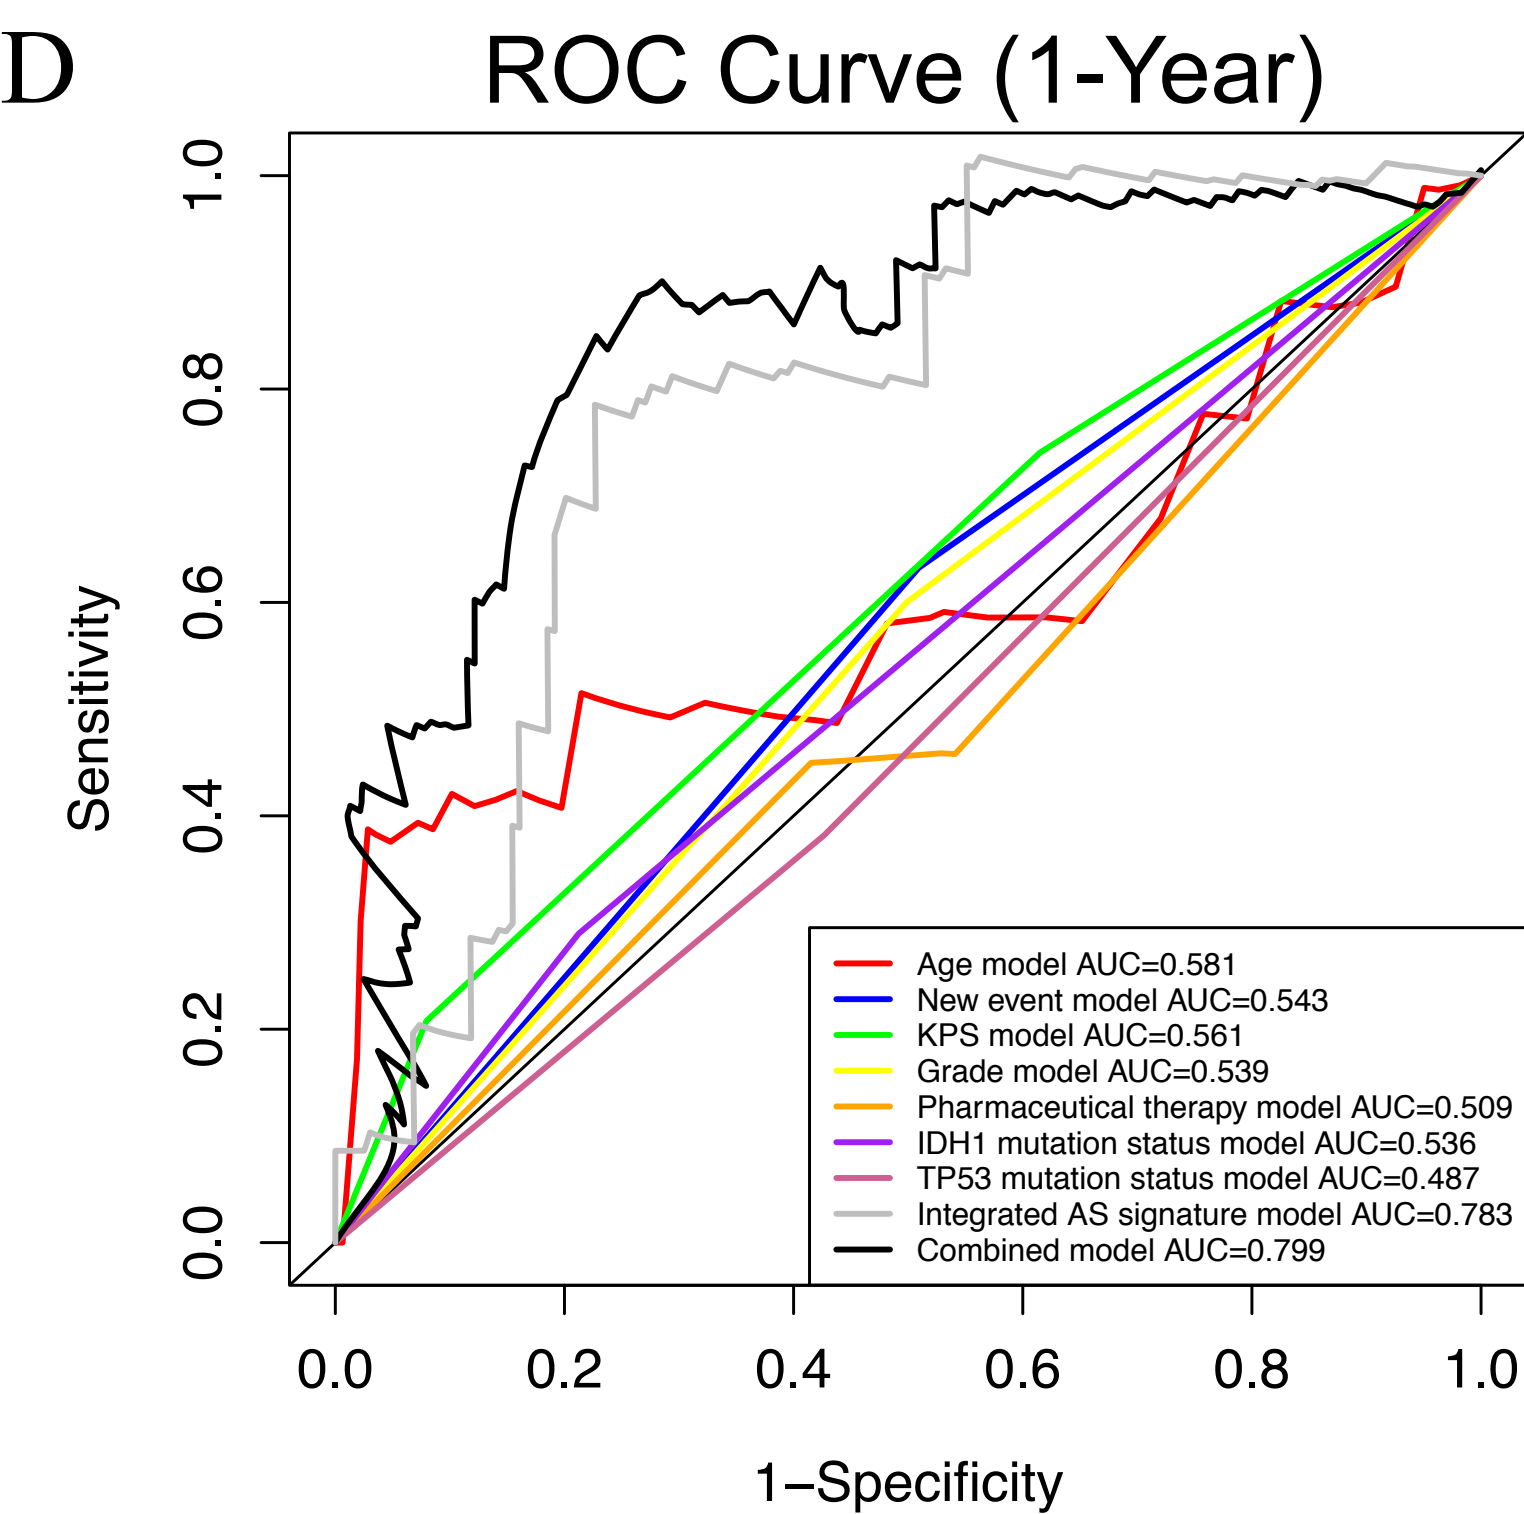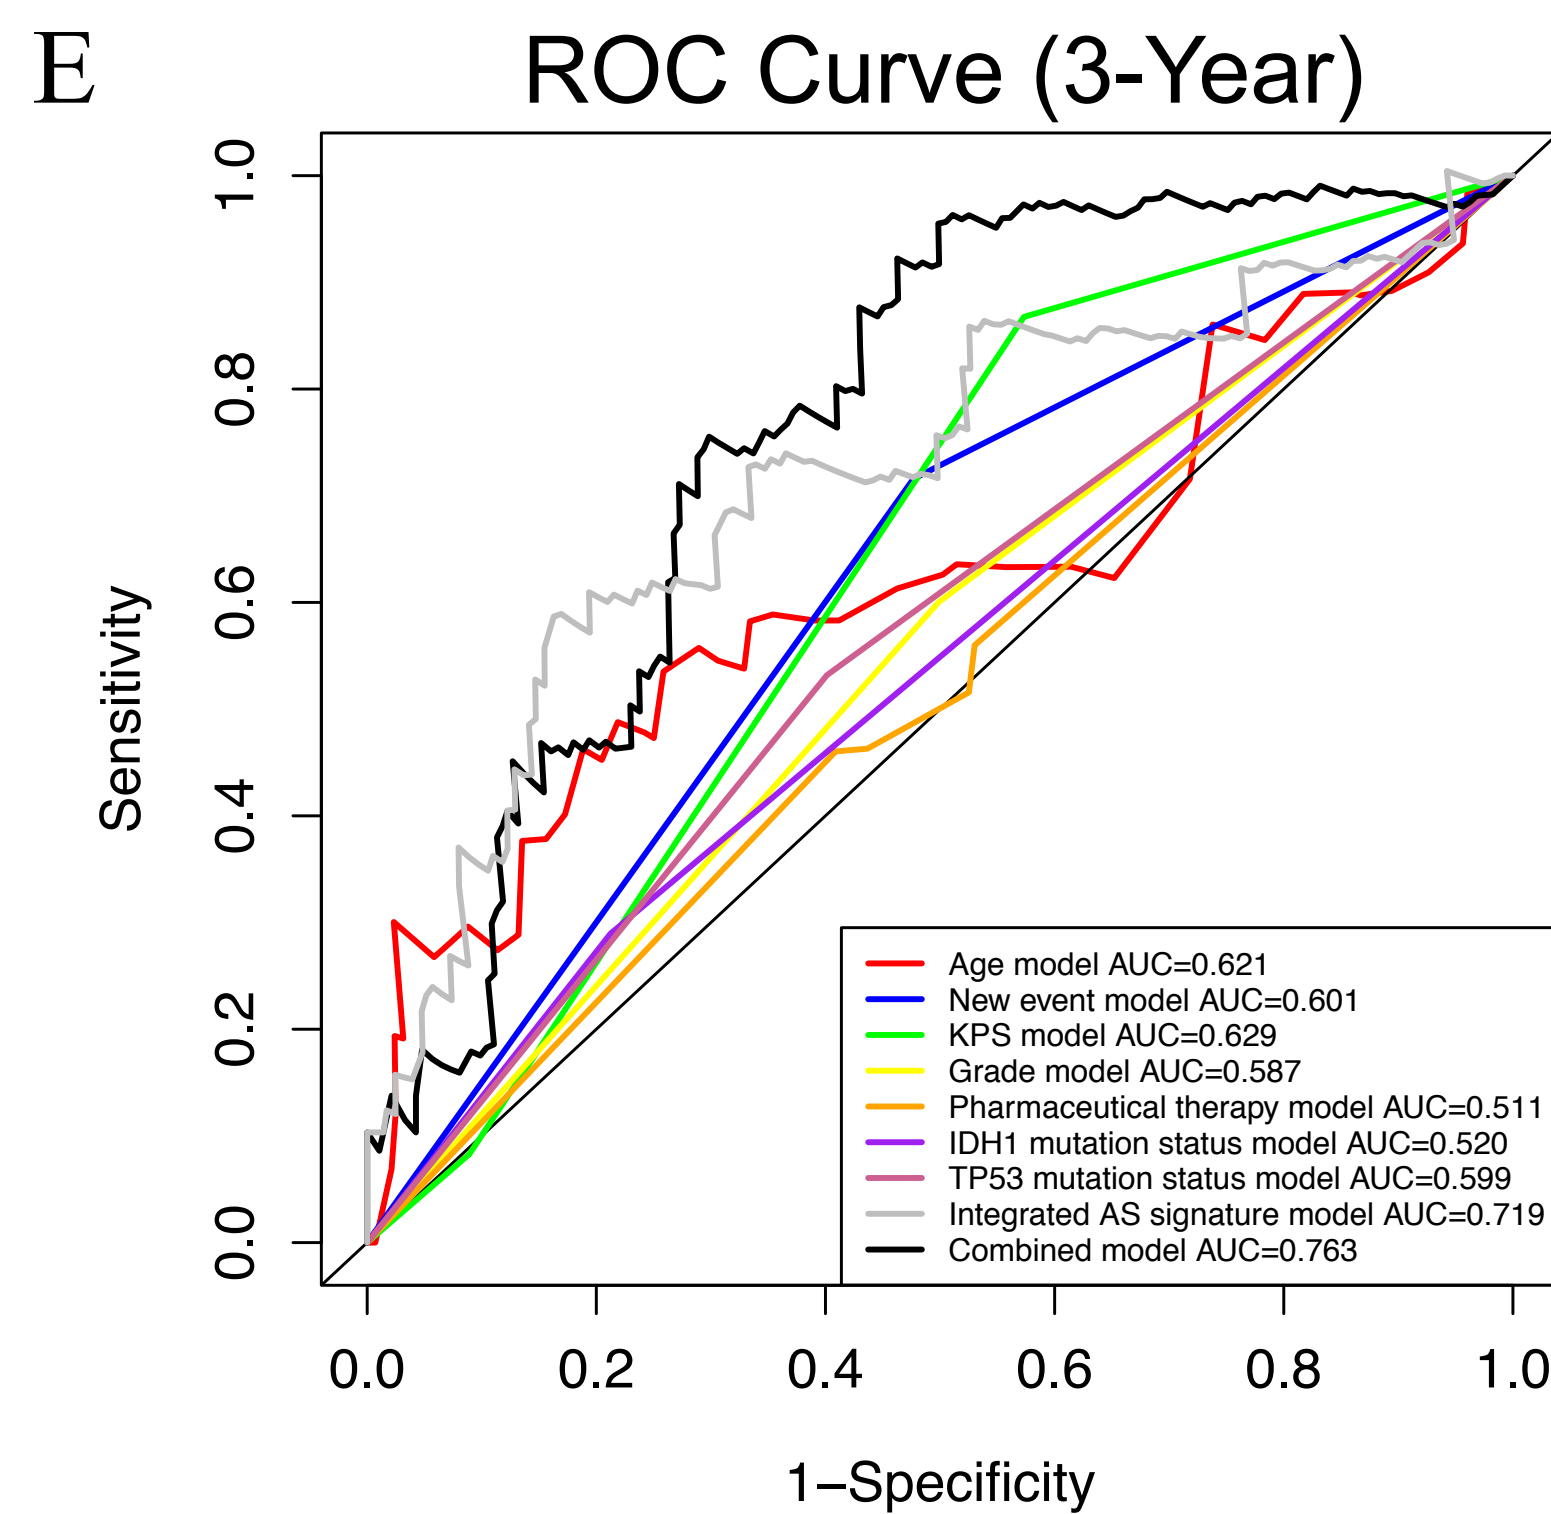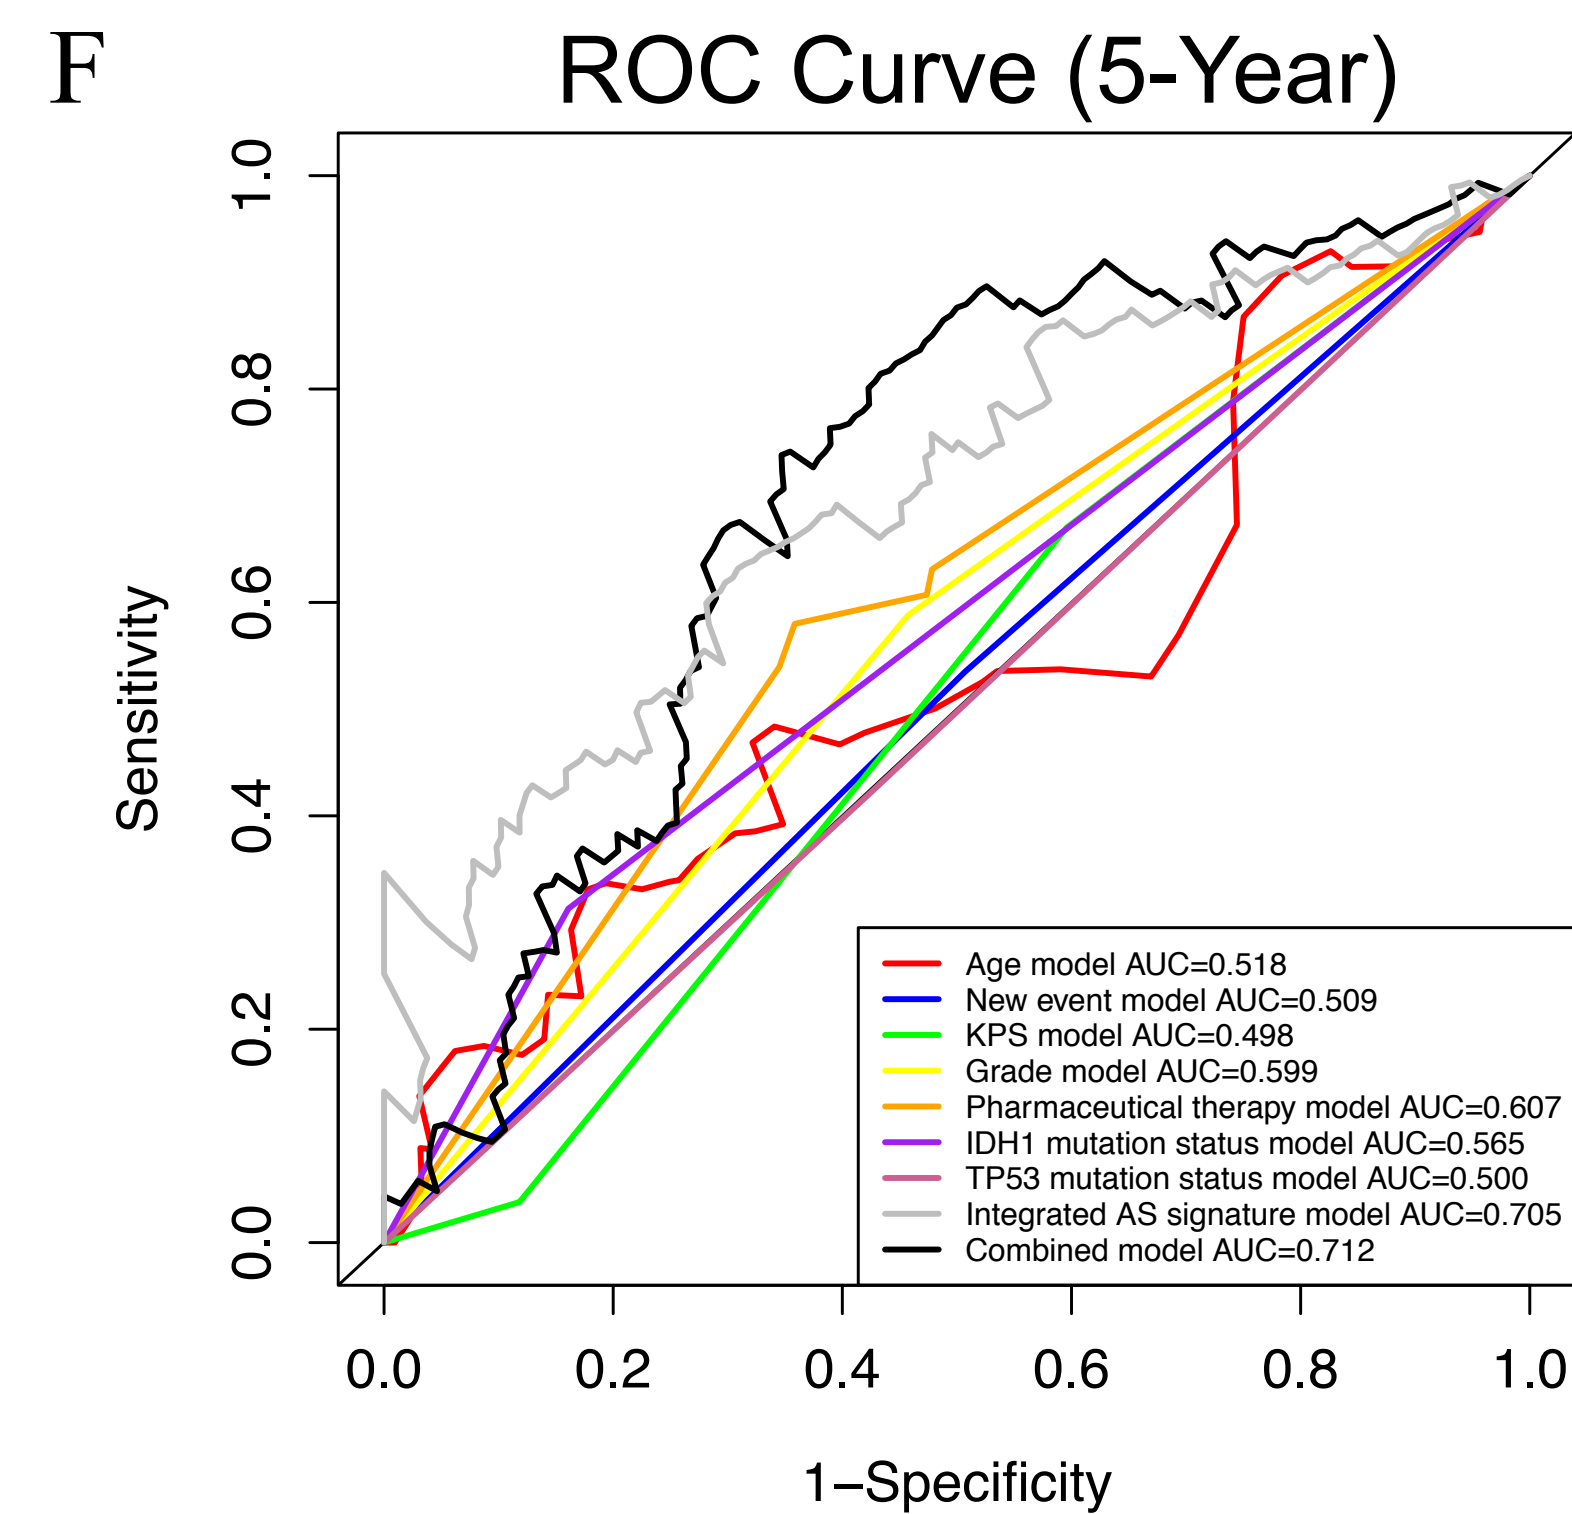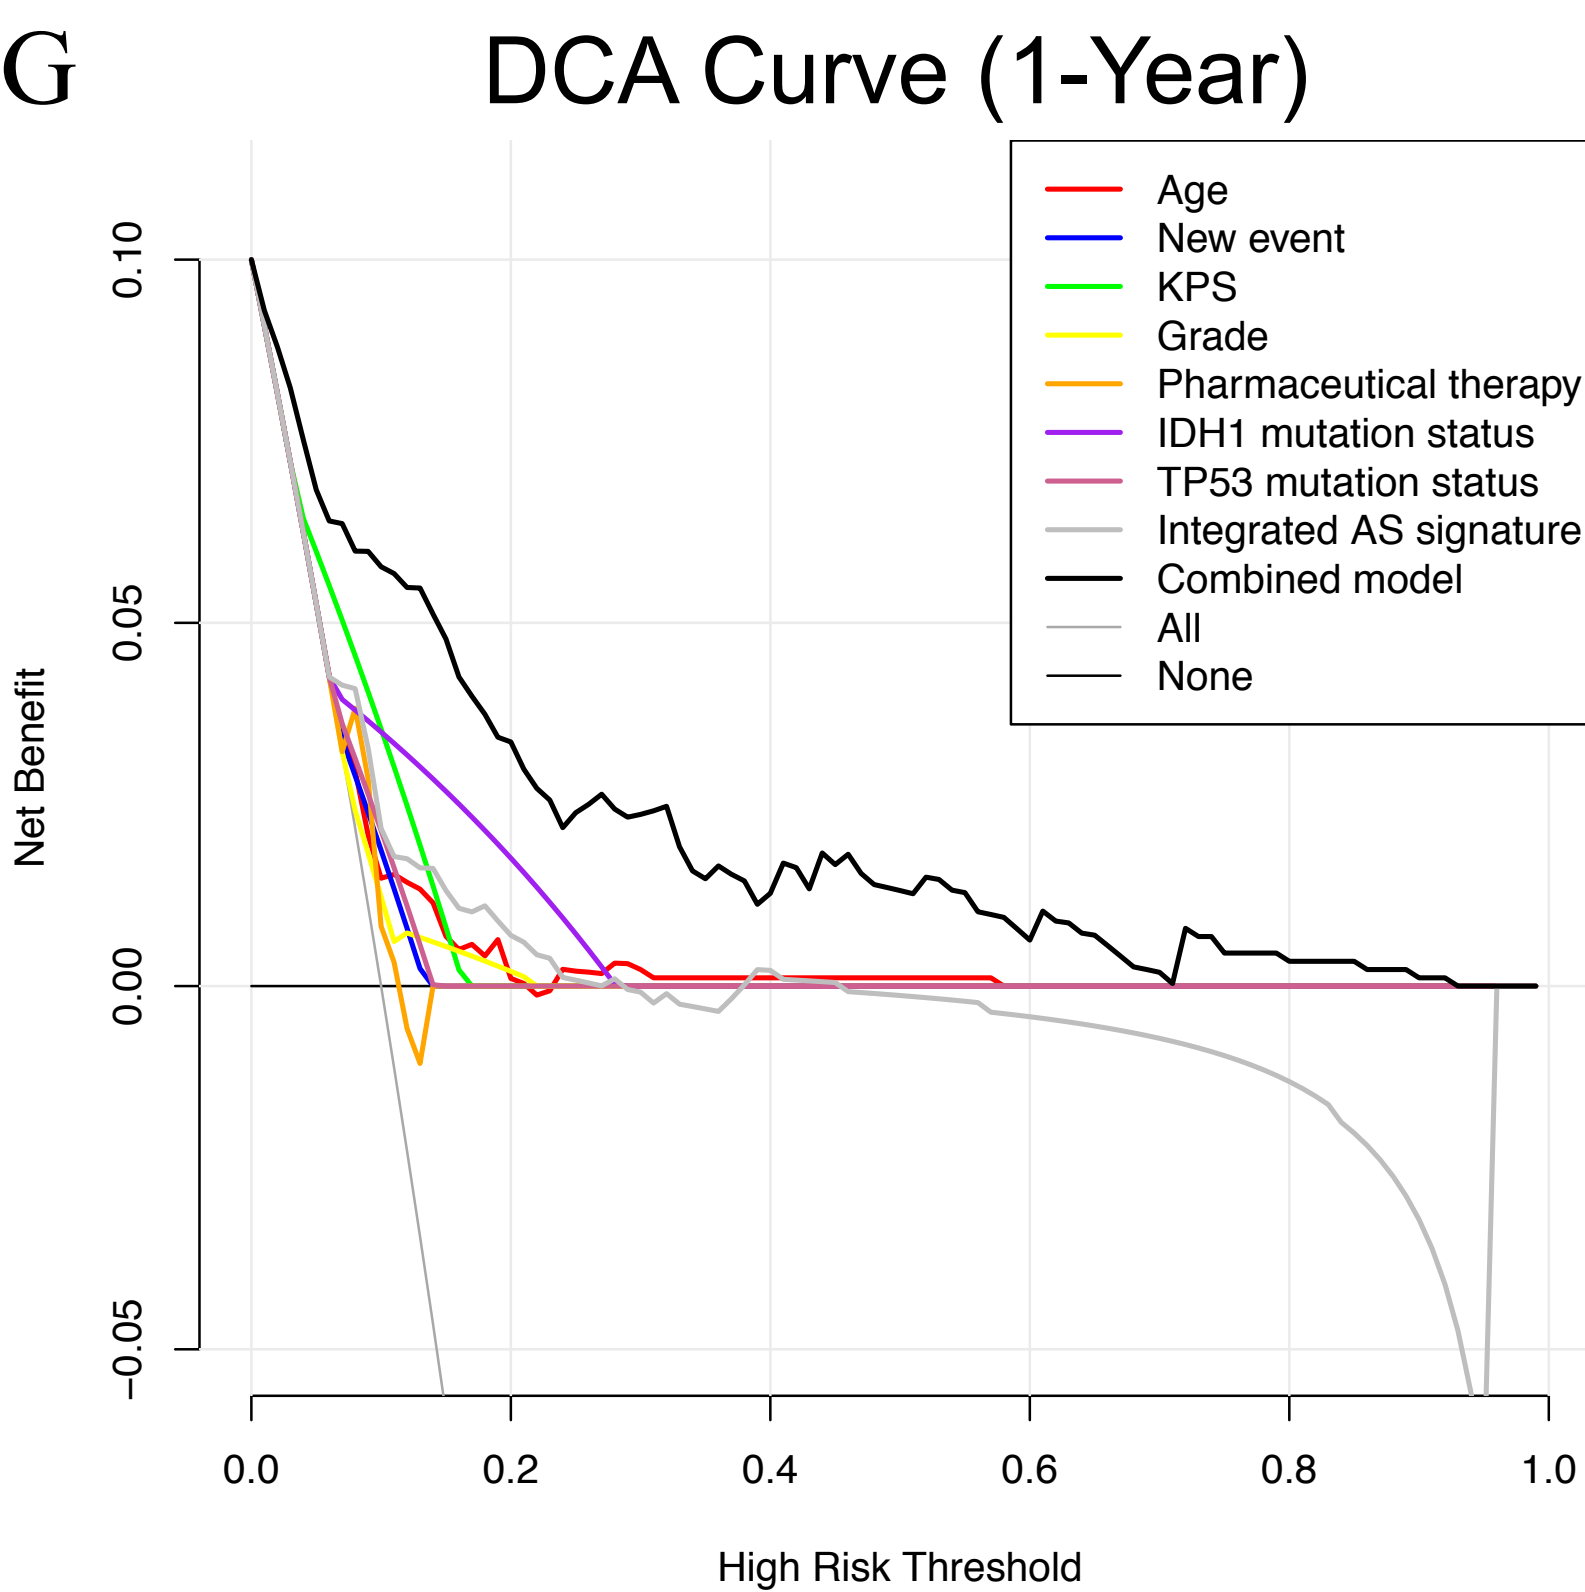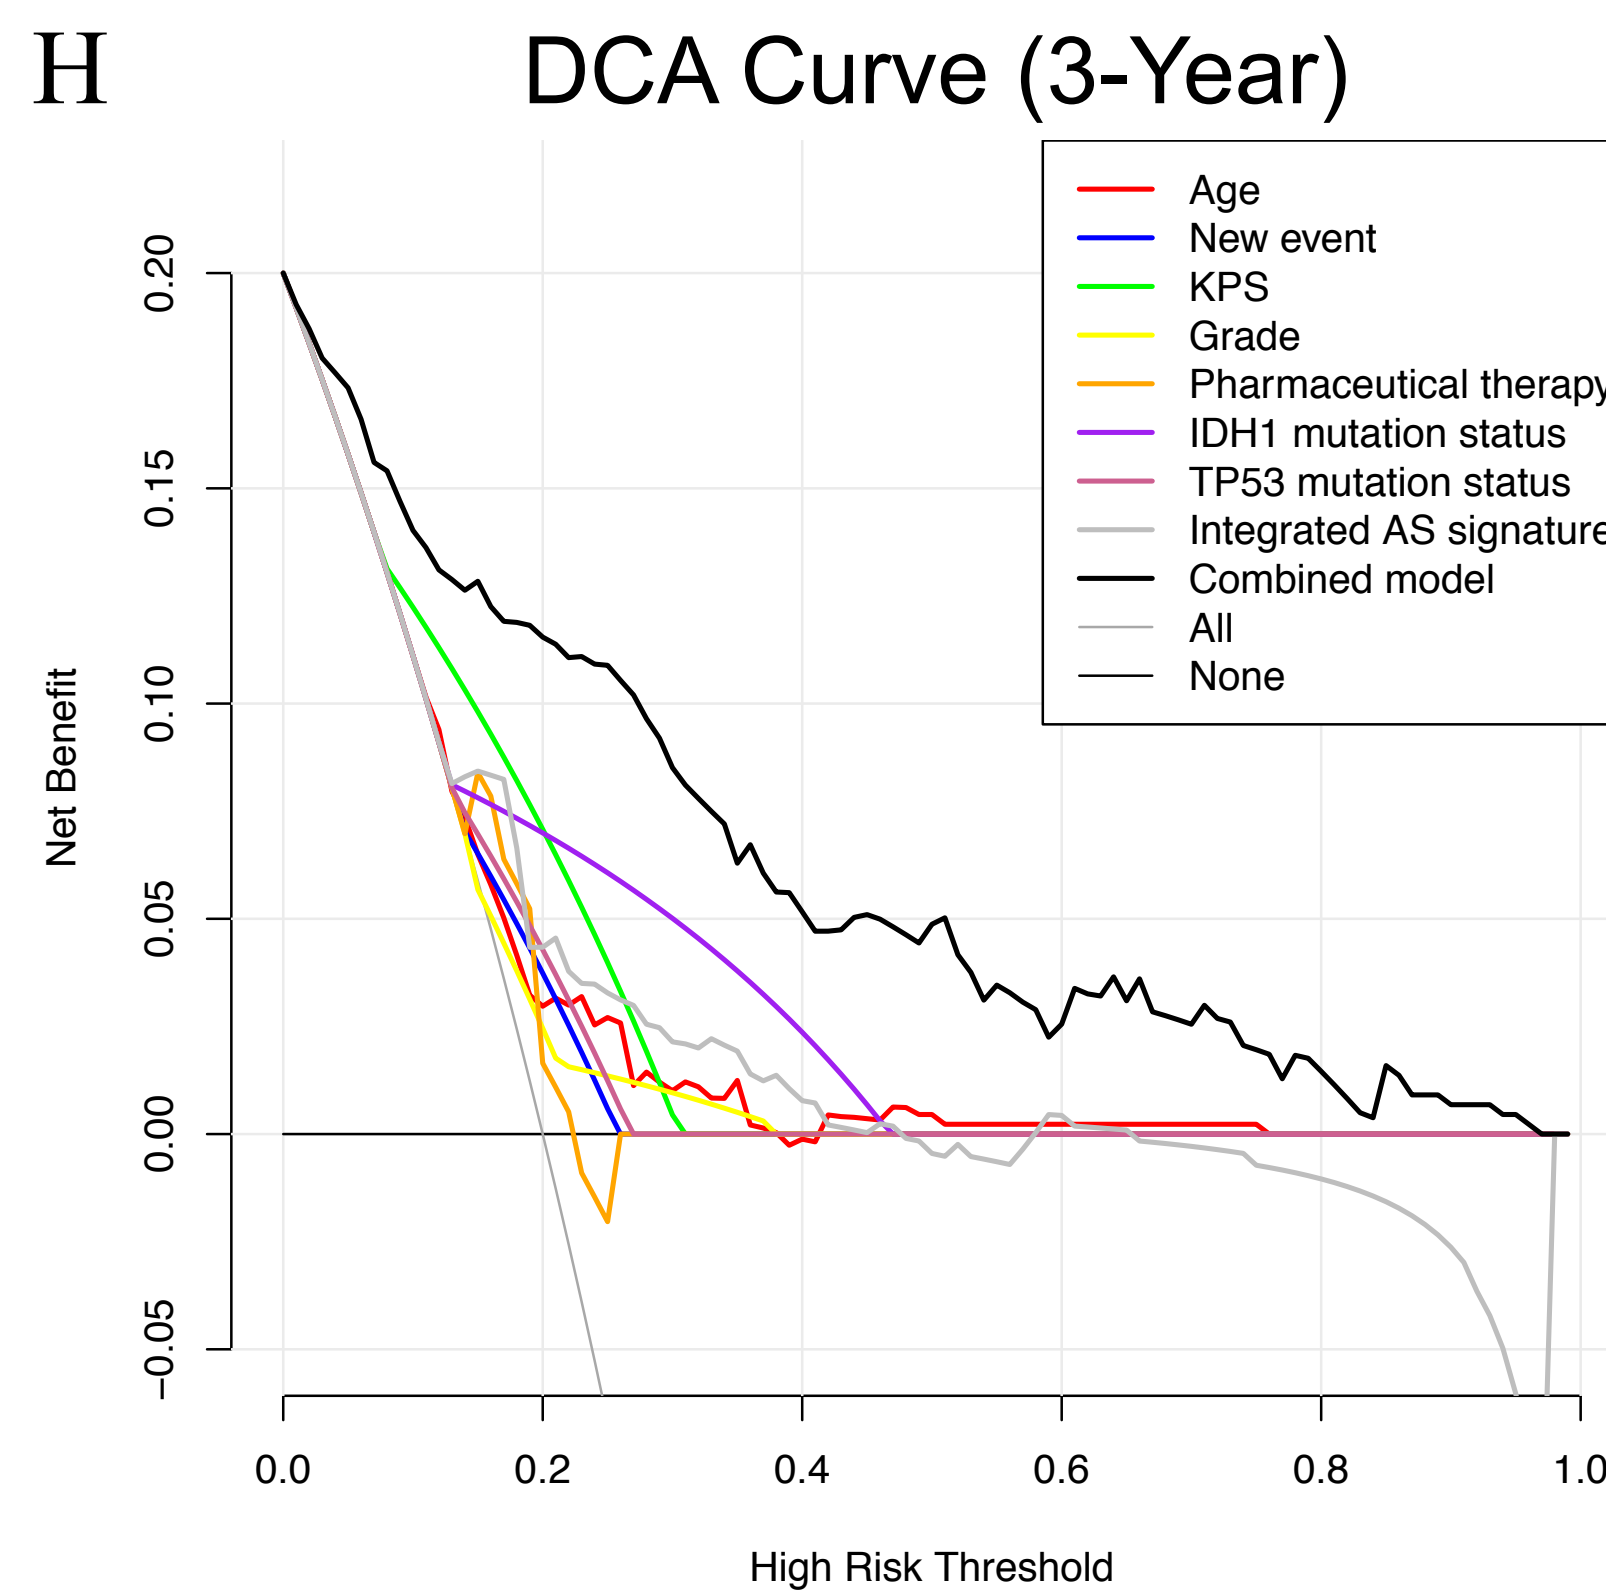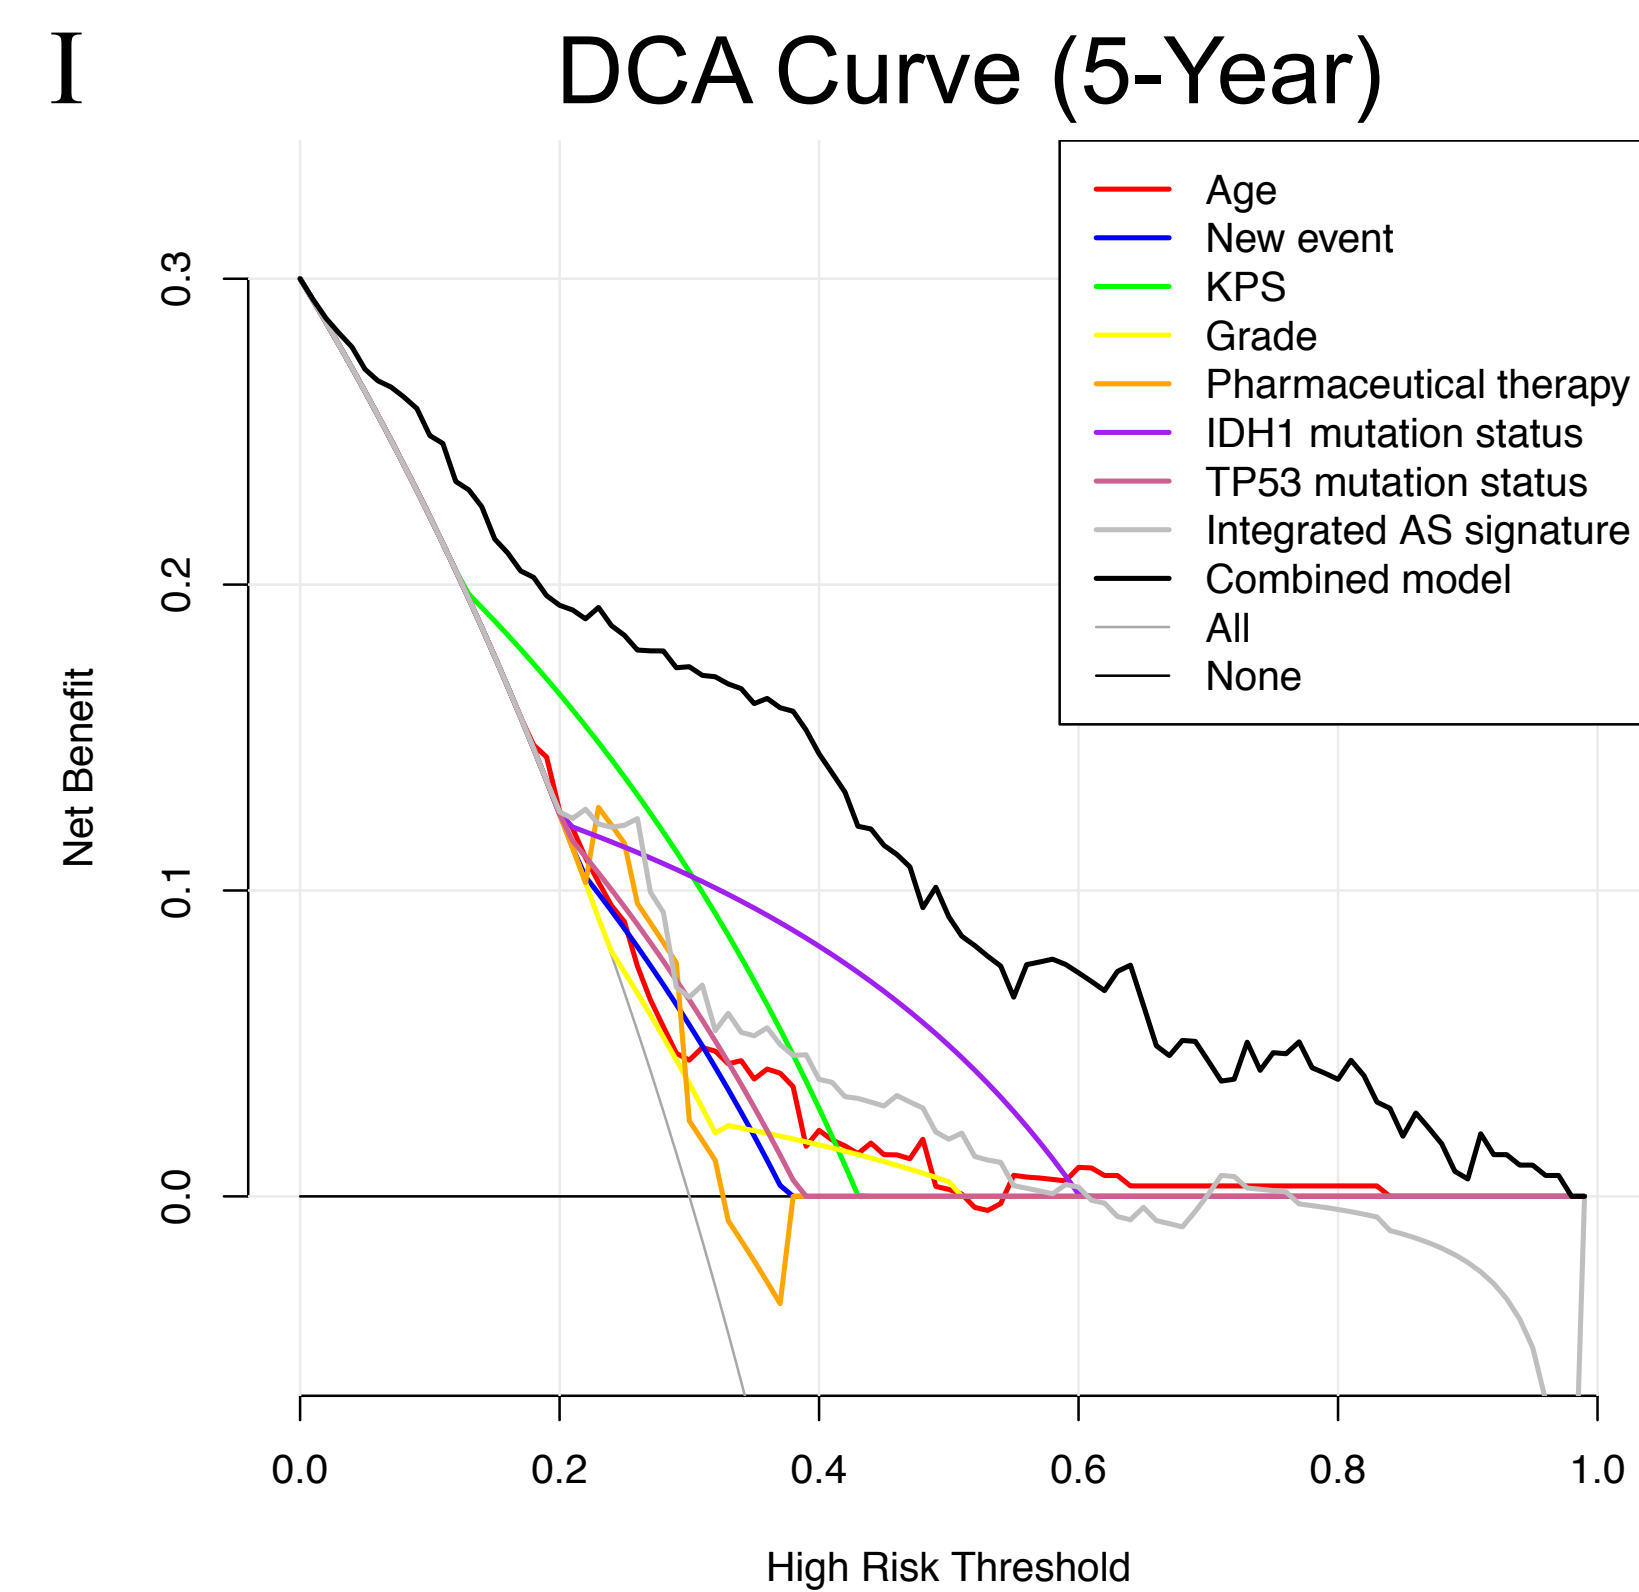

Supplement: CAM4-9-9266-s003.pdf [file CAM4-9-9266-s003.pdf]
